# Supplementary material for: Synthesis, Antibacterial Activity and Cytotoxicity of Azido-Propargyloxy 1,3,5-Triazine Derivatives and Hyperbranched Polymers
Source: Preprints.org preprint supplement (doi:10.20944/preprints202311.1837.v1), 2023-11-29
Supplement: Supplementary file 1 [file supplementary]

Supplementary Materials

Synthesis, antibacterial activity and cytotoxicity of azido-propargyloxy 1,3,5-triazine derivatives and hyperbranched polymers

Anna V. Tsyganova1,2, Artem O. Petrov1*, Alexey V. Shastin1, Natalya V. Filatova1, Victoria A. Mumyatova1, Alexander E. Tarasov and Georgiy V. Malkov1.

1 Federal Research Center of Problems of Chemical Physics and Medicinal Chemistry of Russian Academy of Sciences, Chernogolovka, 142432 Russian Federation

2 Lomonosov Moscow State University, Moscow, 119991, Russian Federation

***** Correspondence: petrov_ao@icp.ac.ru; Tel.: +7 985 490 26 31

NMR and FTIR spectra of compounds (1)-(5)

Рис. 45. FTIR spectra of compound (3).

Рис. 2. 1H NMR spectra of compound (3) in DMSO-d6.

Рис. 3. FTIR spectra of compound (4).

Рис. 48. 1H NMR spectra of compound (4) in DMSO-d6.

Рис. 49. FTIR spectra of compound (5).

Рис. 50. 1H NMR spectra of compound (5) in DMSO-d6.

Рис. 51. FTIR spectra of compound (2).

Рис. 52. 1H NMR spectra of compound (2) in DMSO-d6.

Рис. 53. 13C NMR spectra of compound (5) in DMSO-d6.
